# Supplementary material for: Digital communications and social media use in surgery: how to maximize communication in the digital age
Source: PubMed Central journal article supplement — Innov Surg Sci. 2017 Jul 29;2(3):153–7. doi: 10.1515/iss-2017-0019 (PMC6754014; doi:10.1515/iss-2017-0019), 2017-07-29
Supplement: iss-2-20170019-s001.pdf [file iss-2-20170019-s001.pdf]

## Reviewer Assessment

## Open Access

Martin S. Karpeh Jr.\* and Sarah Bryczkowski

# Digital communications and social media use in surgery: how to maximize communication in the digital age

DOI 10.1515/iss-2017-0019

Received March 22, 2017; accepted April 3, 2017

\*Corresponding author: **Martin S. Karpeh Jr.**, MD, FACS, Department of Surgery, Rutgers New Jersey Medical School, Hackensack University Medical Center, Suite 408, 20 Prospect Avenue, Hackensack, NJ 07601, USA, Phone: +551-996-7952, Fax: +551-996-2021, E-mail: mkarpeh@Hackensackmeridian.org

## Reviewers' Comments to Original Submission

### Reviewer 1: anonymous

Mar 24, 2017

|                                                                   |                 |
|-------------------------------------------------------------------|-----------------|
| <b>Reviewer Recommendation Term:</b>                              | Accept          |
| <b>Overall Reviewer Manuscript Rating:</b>                        | 75              |
| <b>Custom Review Questions</b>                                    | <b>Response</b> |
| Is the subject area appropriate for you?                          | 4               |
| Does the title clearly reflect the paper's content?               | 4               |
| Does the abstract clearly reflect the paper's content?            | 4               |
| Do the keywords clearly reflect the paper's content?              | 4               |
| Does the introduction present the problem clearly?                | 4               |
| Are the results/conclusions justified?                            | 4               |
| How comprehensive and up-to-date is the subject matter presented? | 4               |
| How adequate is the data presentation?                            | N/A             |
| Are units and terminology used correctly?                         | N/A             |
| Is the number of cases adequate?                                  | N/A             |
| Are the experimental methods/clinical studies adequate?           | N/A             |
| Is the length appropriate in relation to the content?             | 4               |
| Does the reader get new insights from the article?                | 4               |
| Please rate the practical significance.                           | 4               |
| Please rate the accuracy of methods.                              | N/A             |
| Please rate the statistical evaluation and quality control.       | N/A             |
| Please rate the appropriateness of the figures and tables.        | N/A             |
| Please rate the appropriateness of the references.                | 4               |
| Please evaluate the writing style and use of language.            | 5 - High/Yes    |
| Please judge the overall scientific quality of the manuscript.    | 4               |
| Are you willing to review the revision of this manuscript?        | Yes             |

**Comments to Authors:**

This is a nice presentation of the actual and future aspects of digital communication within health care. The authors are to be congratulated for highlighting the relevant issues. Additionally, the manuscript points out, that all users of these technologies should be aware of the possibilities of misuse.

---

**Reviewer 2: anonymous**

Apr 01, 2017

---

|                                                                   |                 |
|-------------------------------------------------------------------|-----------------|
| <b>Reviewer Recommendation Term:</b>                              | Accept          |
| <b>Overall Reviewer Manuscript Rating:</b>                        | 80              |
| <b>Custom Review Questions</b>                                    | <b>Response</b> |
| Is the subject area appropriate for you?                          | 5 - High/Yes    |
| Does the title clearly reflect the paper's content?               | 4               |
| Does the abstract clearly reflect the paper's content?            | 4               |
| Do the keywords clearly reflect the paper's content?              | 3               |
| Does the introduction present the problem clearly?                | 3               |
| Are the results/conclusions justified?                            | 4               |
| How comprehensive and up-to-date is the subject matter presented? | 5 - High/Yes    |
| How adequate is the data presentation?                            | N/A             |
| Are units and terminology used correctly?                         | N/A             |
| Is the number of cases adequate?                                  | N/A             |
| Are the experimental methods/clinical studies adequate?           | N/A             |
| Is the length appropriate in relation to the content?             | 5 - High/Yes    |
| Does the reader get new insights from the article?                | 5 - High/Yes    |
| Please rate the practical significance.                           | 4               |
| Please rate the accuracy of methods.                              | N/A             |
| Please rate the statistical evaluation and quality control.       | N/A             |
| Please rate the appropriateness of the figures and tables.        | N/A             |
| Please rate the appropriateness of the references.                | 3               |
| Please evaluate the writing style and use of language.            | 4               |
| Please judge the overall scientific quality of the manuscript.    | 4               |
| Are you willing to review the revision of this manuscript?        | Yes             |

**Comments to Authors:**

This article is a good illustration and overview of using digital communication and social media in modern surgery. Many important aspects are named. The importance of using social media will increase in the next years, reflecting the recent development of the last 20 years. Applying social media platforms will be unavoidable for the younger generation of physicians and patients. In this paper, the authors reflect all important platforms but also don't forget to mention the risks of using patients data in the world wide web, e.g. encryption and safety issues of personal data.

---
